# Supplementary material
Source: MDPI journal article supplement (https://www.mdpi.com/2073-4395/13/12/3072)
Supplement: s1 [file s1]

# Responses of Crop and Soil Phosphorus Fractions to Long-Term Fertilization Regimes in a Loess Soil in Northwest China

Asif Khan <sup>1,2</sup>, Xueyun Yang <sup>1</sup>, Benhua Sun <sup>1</sup>, Shulan Zhang <sup>1,\*</sup> and Binghui He <sup>2</sup>

<sup>1</sup> Key Laboratory of Plant Nutrition and the Agri-Environment in Northwest China, Ministry of Agriculture, College of Natural Resources and Environment, Northwest A & F University, Yangling 712100, China; khansoilscientist27@gmail.com (A.K.); xueyunyang@nwfau.edu.cn (X.Y.); sunbenhua@nwfau.edu.cn (B.S.)

<sup>2</sup> College of Resources and Environment, Southwest University, Beibei District, Chongqing 400715, China; hebinghui@swu.edu.cn

\* Correspondence: zhangshulan@nwfau.edu.cn

**Pages** 4

**Table** 1

**Figure** 2

**Table S1.** Soil physio-chemical properties (mean  $\pm$  SD) measured in different fertilization treatments under the Winter wheat–summer maize cropping systems at 0–20 cm depth.

| Items                                       | Treatments       |                  |                  |                  |
|---------------------------------------------|------------------|------------------|------------------|------------------|
|                                             | CK               | NPK              | SNPK             | MNPK             |
| SOC (g kg <sup>-1</sup> )                   | 8 $\pm$ 1c       | 10 $\pm$ 0.3b    | 9 $\pm$ 1b       | 15 $\pm$ 1a      |
| SIC (g kg <sup>-1</sup> )                   | 9 $\pm$ 1b       | 11 $\pm$ 2a      | 11 $\pm$ 3a      | 10 $\pm$ 4ab     |
| Total-N (g kg <sup>-1</sup> )               | 0.9 $\pm$ 3d     | 1.2 $\pm$ 1c     | 1.4 $\pm$ 2b     | 1.9 $\pm$ 3a     |
| Soil pH                                     | 8.4 $\pm$ 1a     | 8.3 $\pm$ 1a     | 8.2 $\pm$ 1a     | 8.1 $\pm$ 2a     |
| Bulk density (g cm <sup>-3</sup> )          | 1.43 $\pm$ 0.01a | 1.33 $\pm$ 0.01b | 1.29 $\pm$ 0.01b | 1.33 $\pm$ 0.01b |
| Exch. K (mg kg <sup>-1</sup> )              | 157 $\pm$ 7d     | 237 $\pm$ 11c    | 277 $\pm$ 14b    | 378 $\pm$ 12a    |
| Total-P (mg kg <sup>-1</sup> )              | 631 $\pm$ 52d    | 893 $\pm$ 132c   | 962 $\pm$ 157b   | 1423 $\pm$ 373a  |
| Olsen-P (mg kg <sup>-1</sup> )              | 4 $\pm$ 2d       | 23 $\pm$ 9c      | 28 $\pm$ 9b      | 170 $\pm$ 66a    |
| CaCl <sub>2</sub> -P (mg kg <sup>-1</sup> ) | 0.21 $\pm$ 0.03c | 0.31 $\pm$ 0.23b | 0.28 $\pm$ 0.16b | 3.53 $\pm$ 1.25a |
| Clay (g kg <sup>-1</sup> )                  | 293 $\pm$ 0.4    | 297 $\pm$ 0.2    | 288 $\pm$ 0.2    | 263 $\pm$ 21     |
| Silt (g kg <sup>-1</sup> )                  | 459 $\pm$ 0.3    | 457 $\pm$ 0.3    | 452 $\pm$ 0.3    | 463 $\pm$ 16     |
| Sand (g kg <sup>-1</sup> )                  | 232 $\pm$ 0.4    | 235 $\pm$ 0.5    | 224 $\pm$ 0.5    | 275 $\pm$ 24     |

Different lower-case letters in the same row indicate significant differences between different treatments ( $P < 0.05$ ).

**Figure S1.**

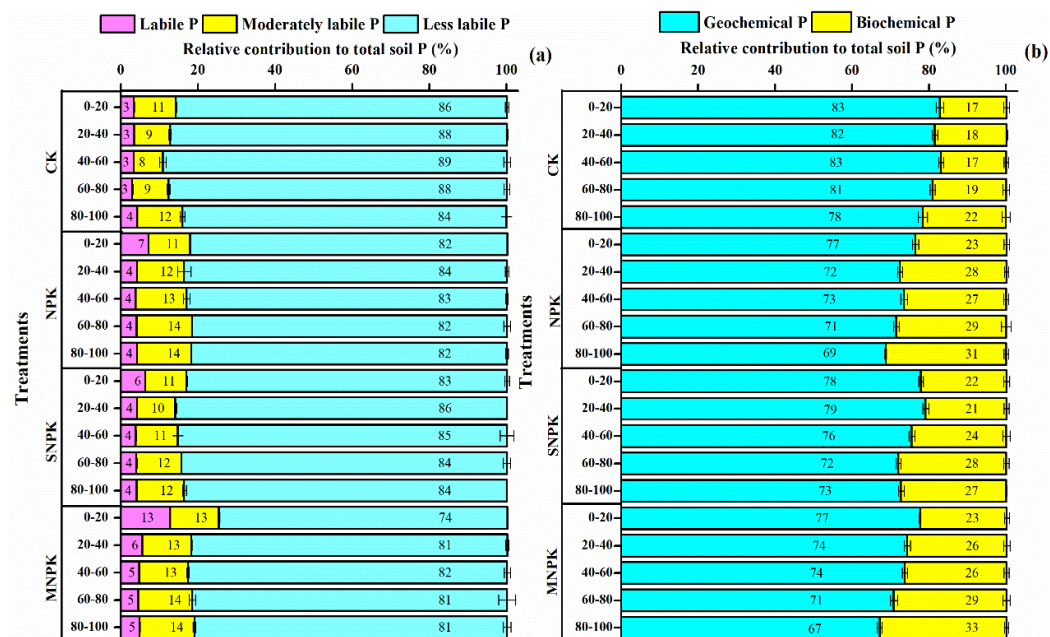

**Figure S1.** The relative contribution of various soil phosphorus pools to total P: (a) labile moderately and less labile phosphorus, and (b) Geo-biochemical phosphorus pools in the 0–100 cm profile in different fertilization treatments under winter wheat–summer maize cropping system. Error bars denote the standard error of the mean.

**Figure S2.**

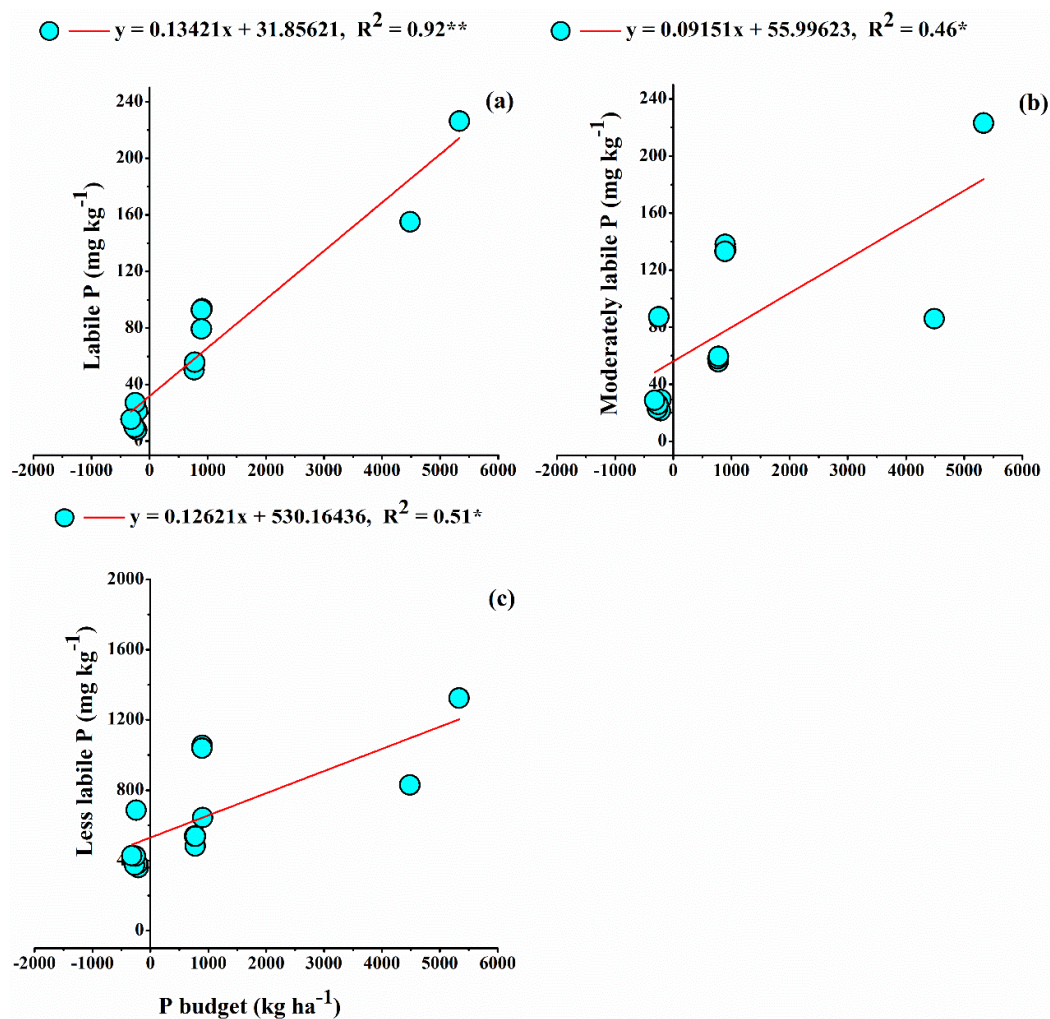

**Figure S2.** Relationships between P budget (kg ha<sup>-1</sup>) and inorganic and organic P components of P fraction contents at surface (0–20 cm) layer (mg kg<sup>-1</sup>); (a) labile P, (b) moderately-labile P, (c) and less labile P across fertilization treatments determined in 2010 and 2014 years.
